# Supplementary material for: A Novel 3,9-(1,2,3-Trioxocine)-Type Steroid of Rauia nodosa (Rutaceae)
Source: MDPI journal article supplement (doi:10.3390/molecules190914637), 2014-09-16

# Supplementary Materials

Figure S1. Spectra HRESIMS (E+) of compound 6.

<Spectrum>

MSMS: Precursor m/z — /+ Base Peak 377.32(1870342)

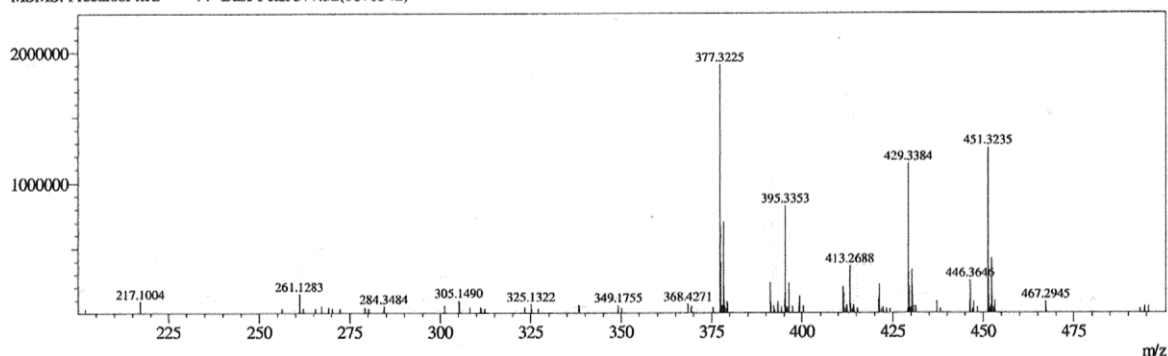

MSMS: Precursor m/z — /- Base Peak 248.96(4250497)

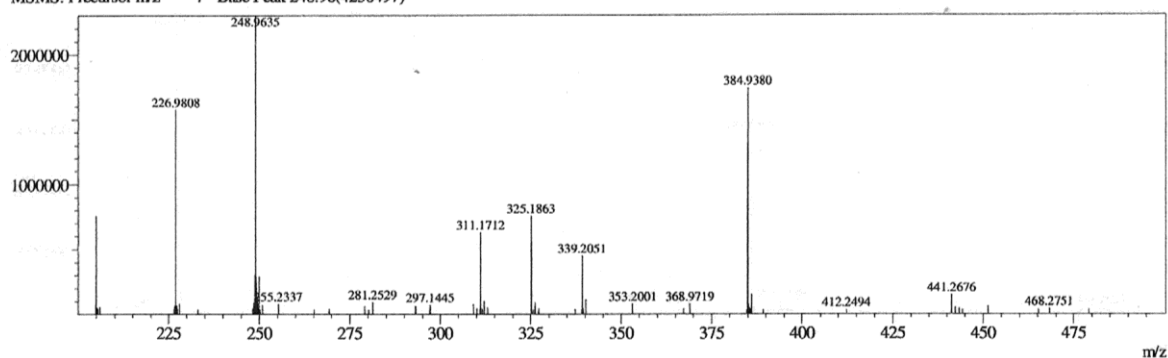

Figure S2. Spectra HRESIMS (E+) of compound 6.

<Spectrum>

MSMS: Precursor m/z — /+ Base Peak 391.29(3218077)

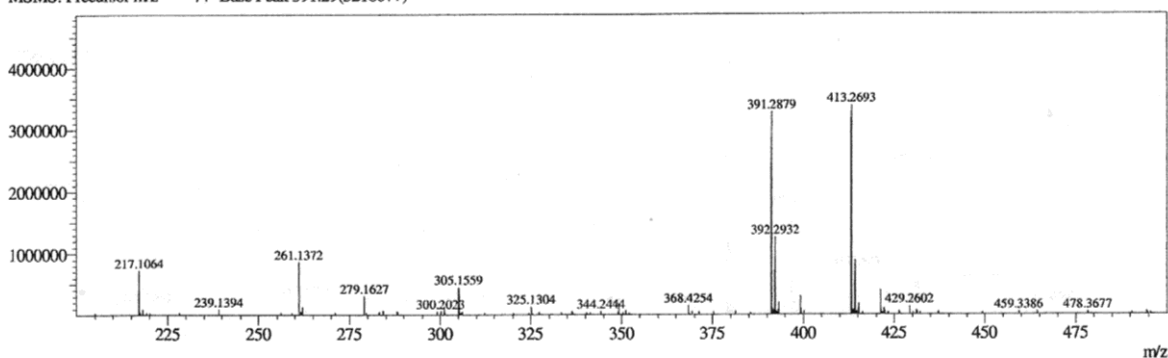

MSMS: Precursor m/z — /- Base Peak 248.96(4527385)

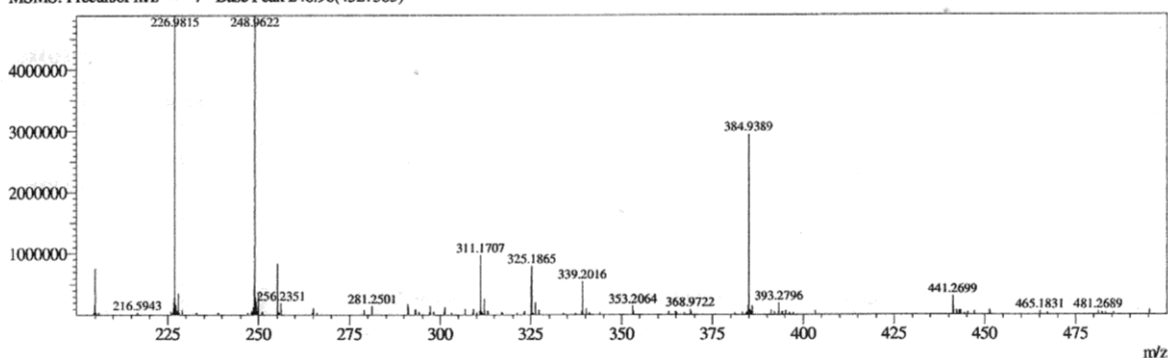

**Figure S3.** Spectra HRESIMS (E+) of compound **6**.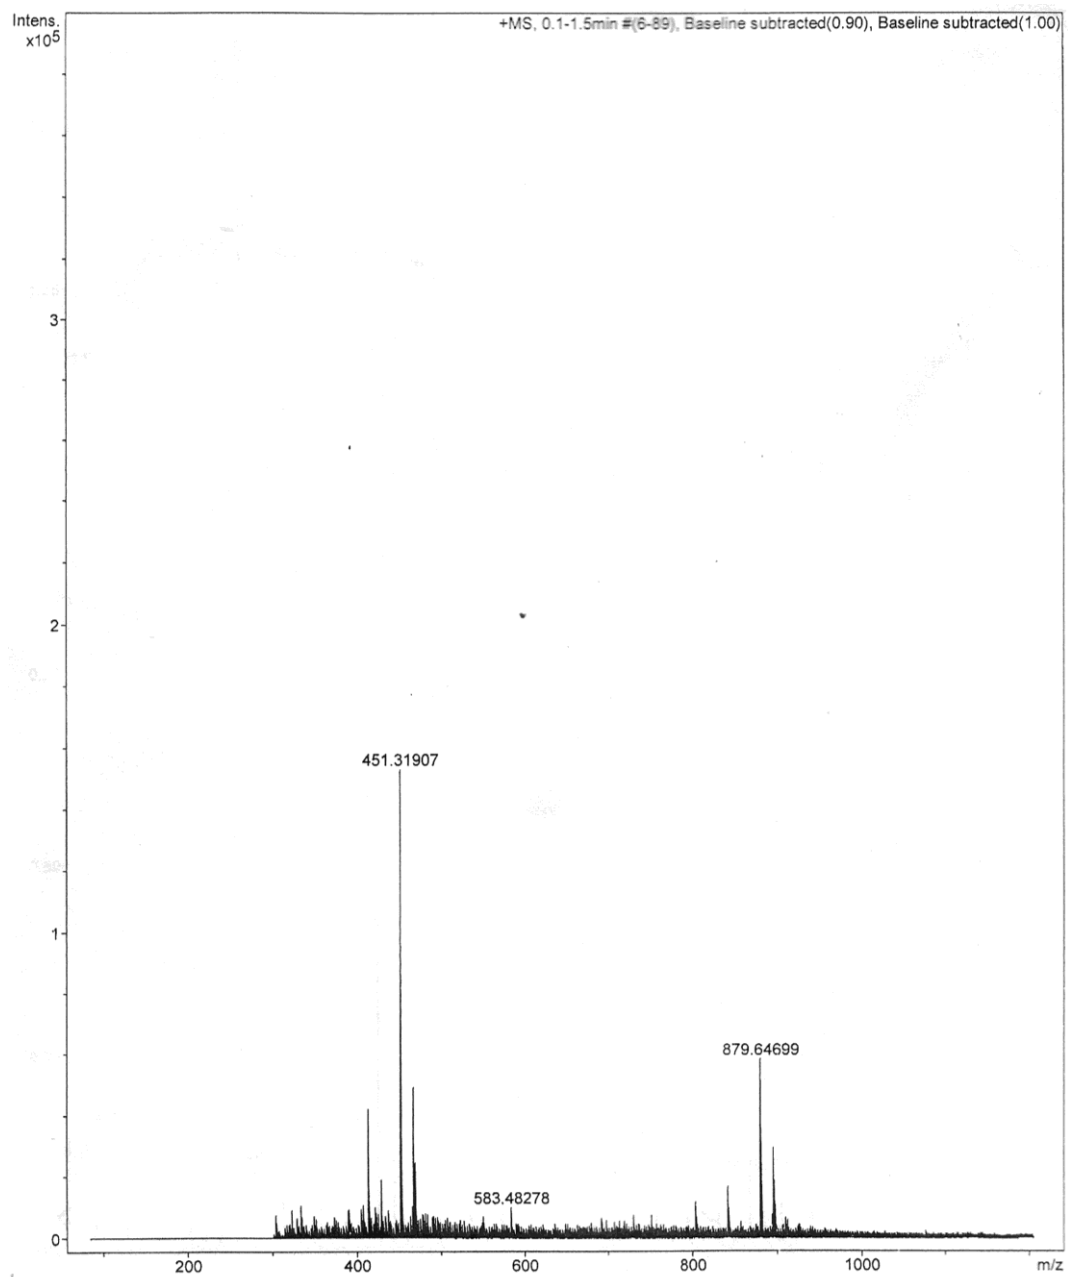

**Figure S4.**  $^{13}\text{C}$  NMR -DEPT Q NMR (125 MHz,  $\text{CDCl}_3$ ) spectrum of compound 6.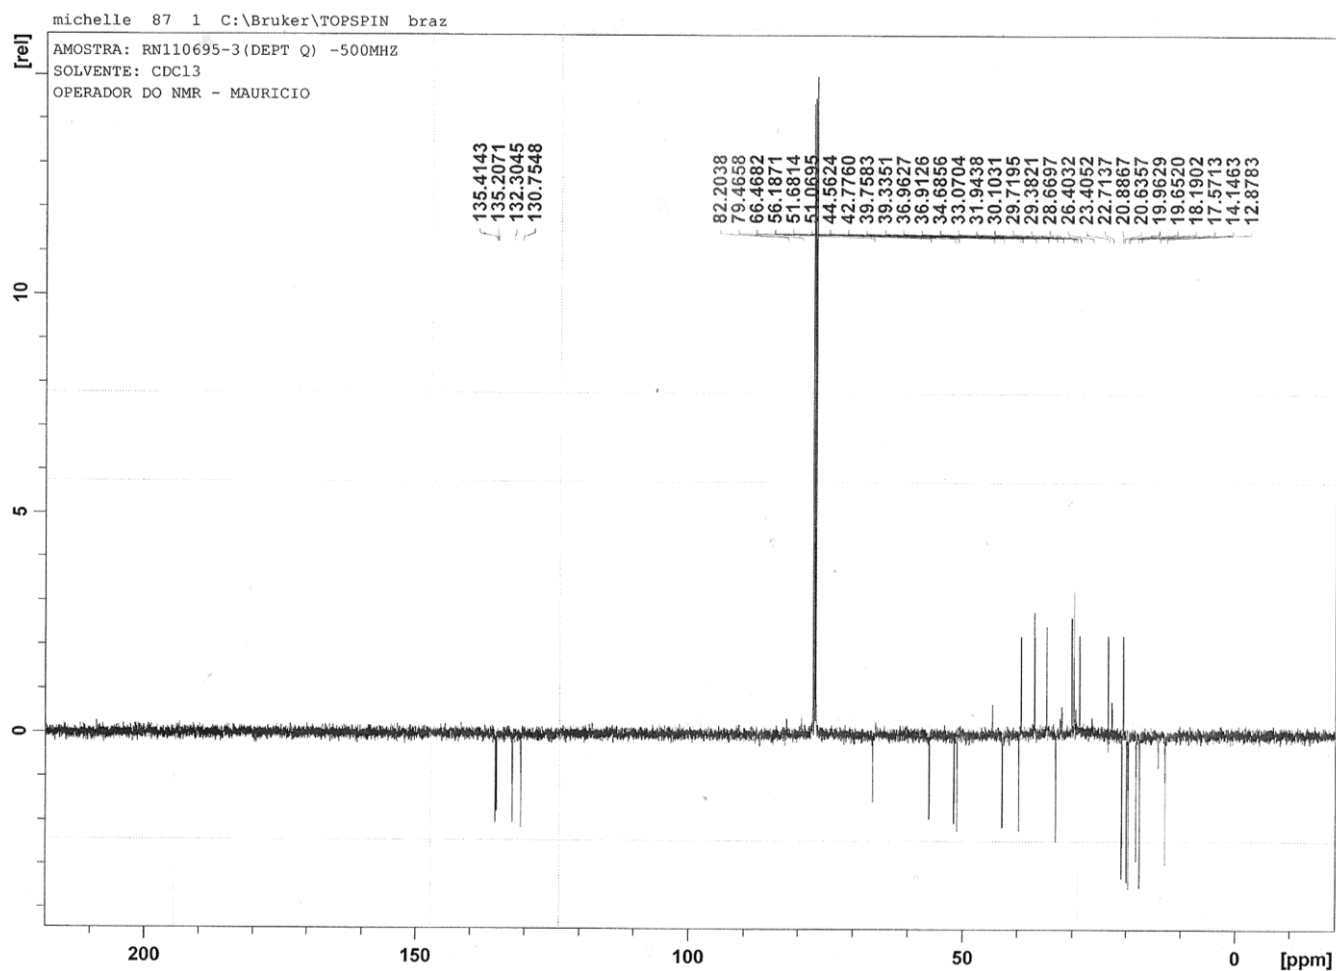

**Figure S5.**  $^1\text{H}$  NMR (500 MHz,  $\text{CDCl}_3$ ) spectrum of compound **6**.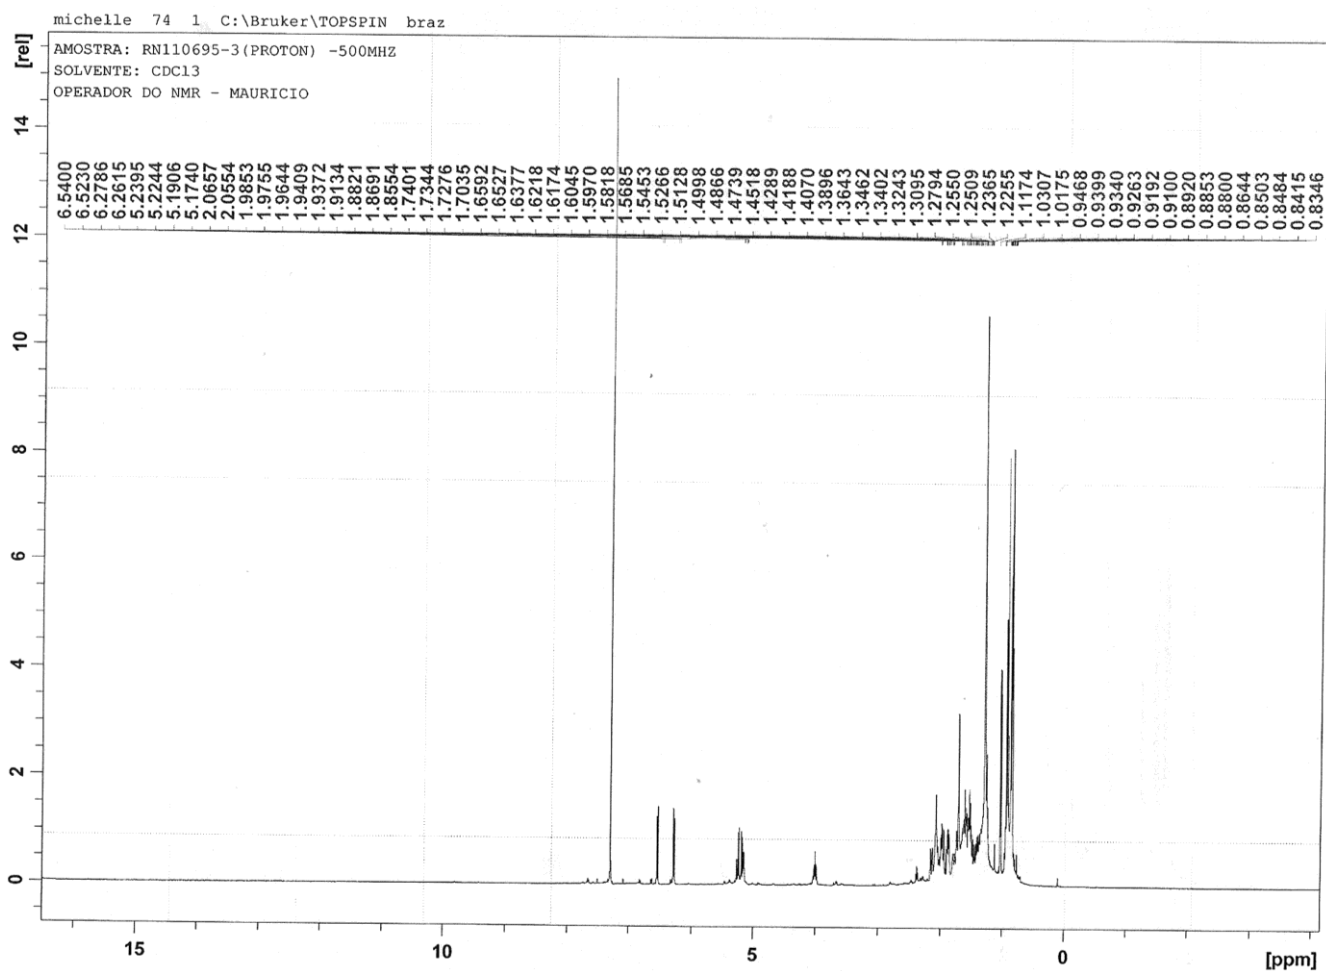

**Figure S6.**  $^1\text{H}$ - $^1\text{H}$  COSY NMR (500 MHz,  $\text{CDCl}_3$ ) spectrum of compound **6**.

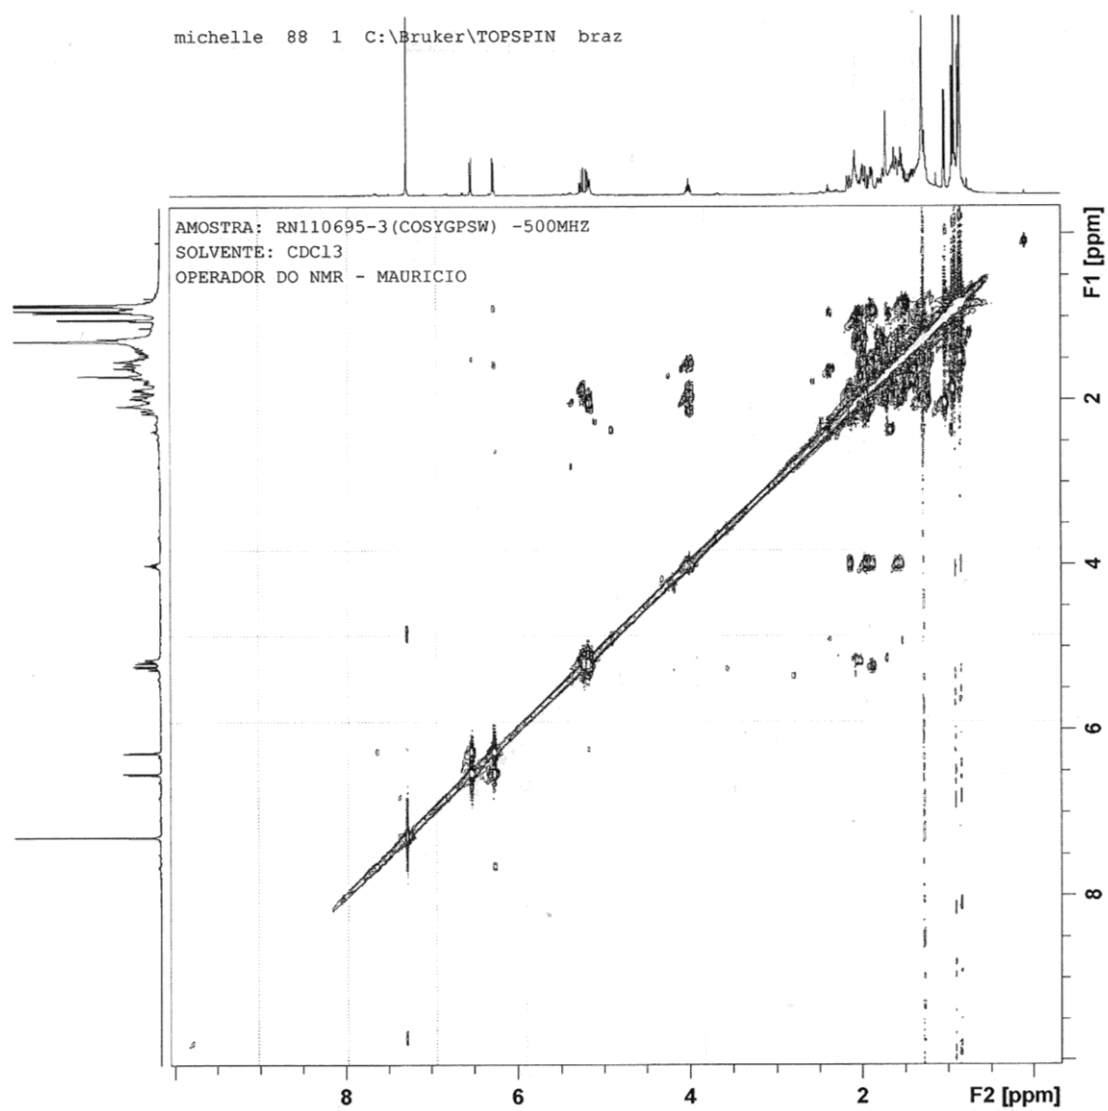

**Figure S7.**  $^1\text{H}$ - $^1\text{H}$  NOESY NMR (500 MHz,  $\text{CDCl}_3$ ) spectrum of compound 6.

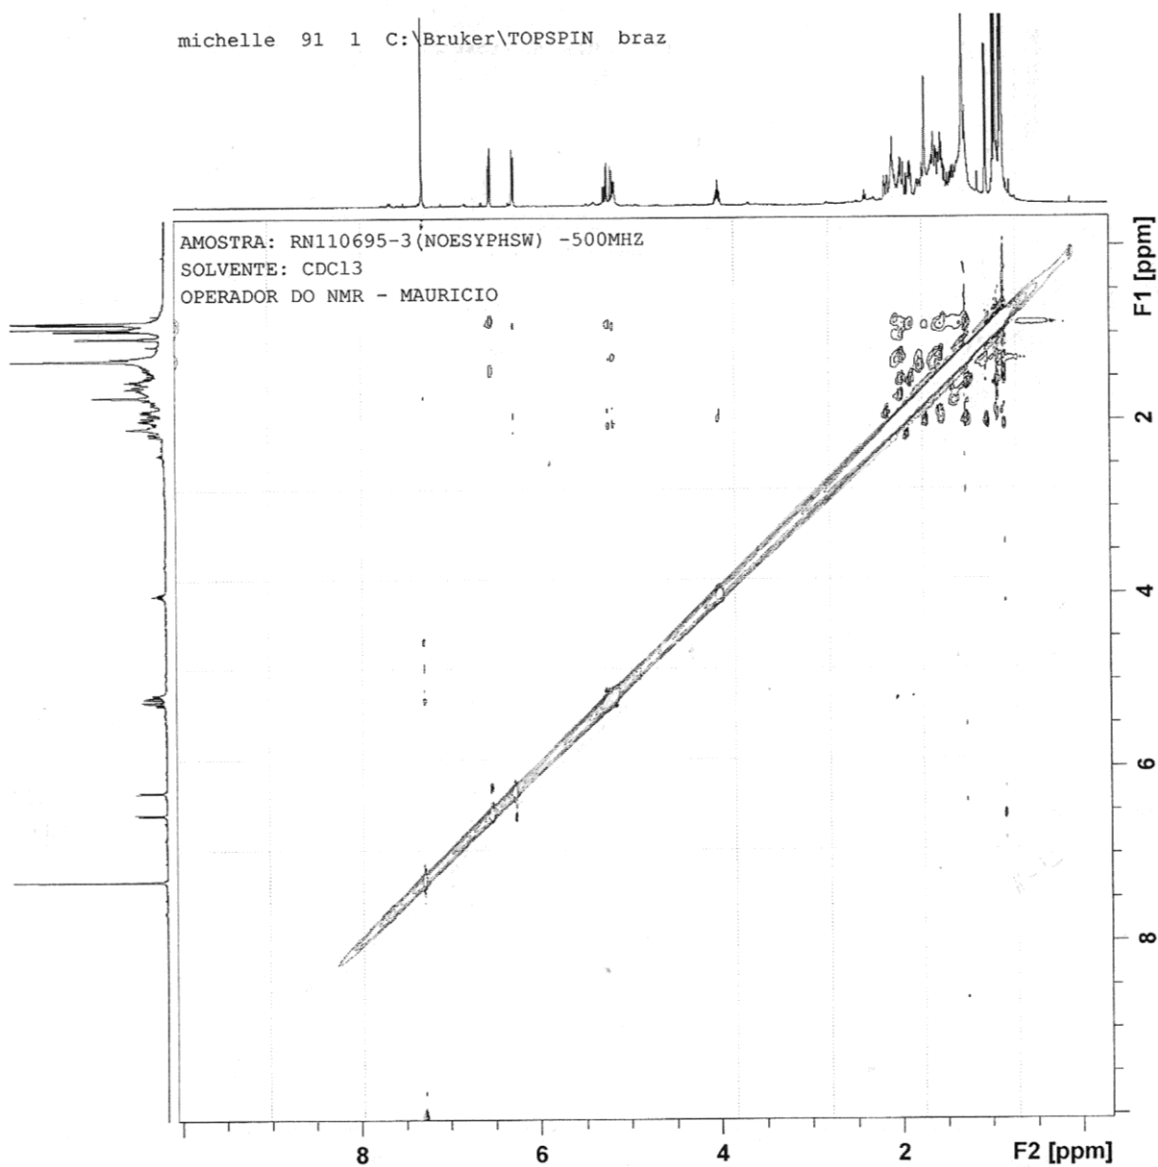

**Figure S8.**  $^1\text{H}$ - $^1\text{H}$  NOESY NMR (500 MHz,  $\text{CDCl}_3$ ) spectrum of compound 6.

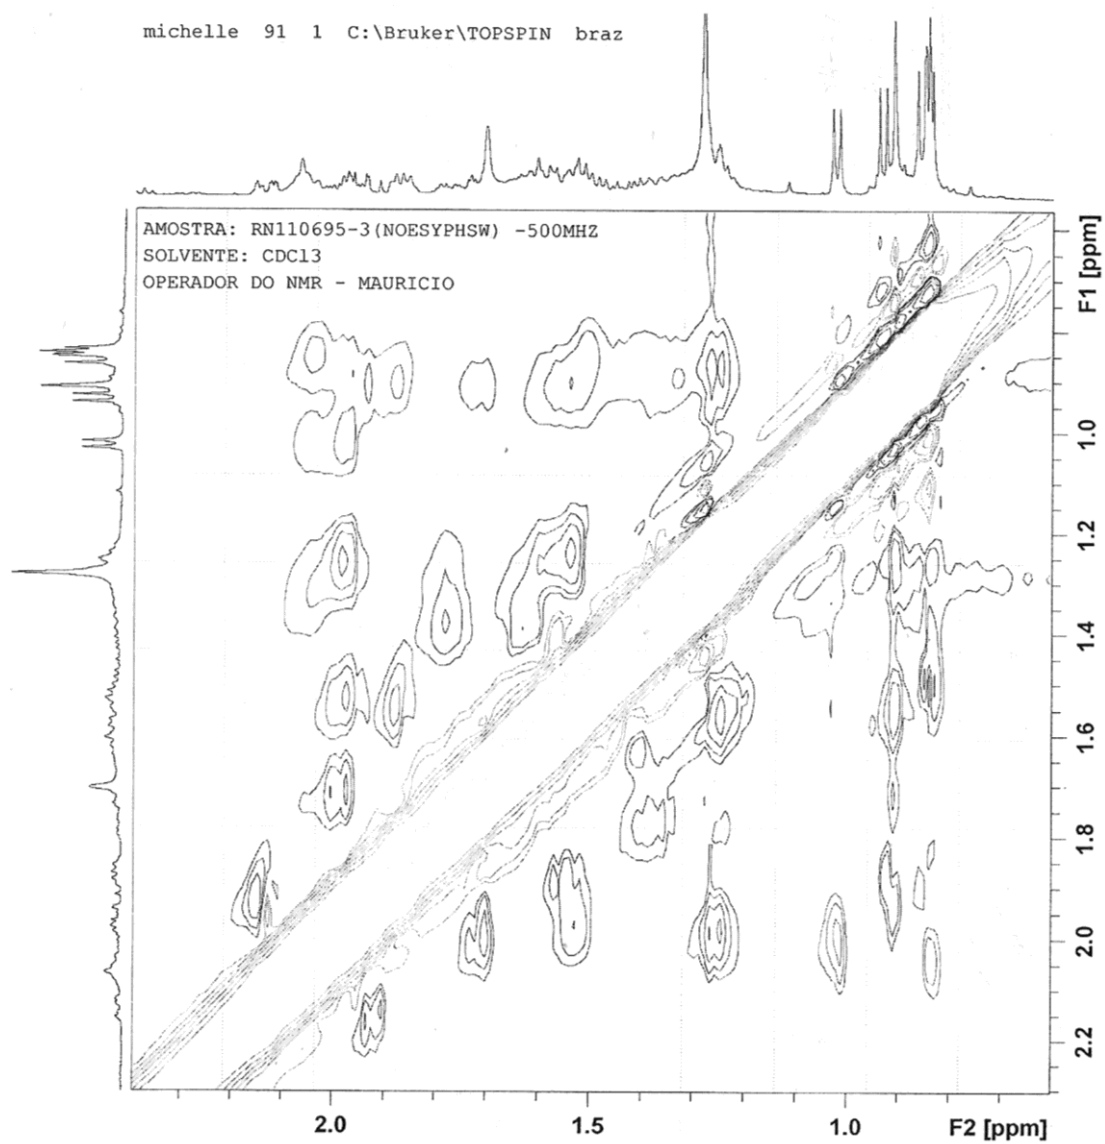

**Figure S9.** HSQC NMR (500 MHz, CDCl<sub>3</sub>) spectrum of compound 6.

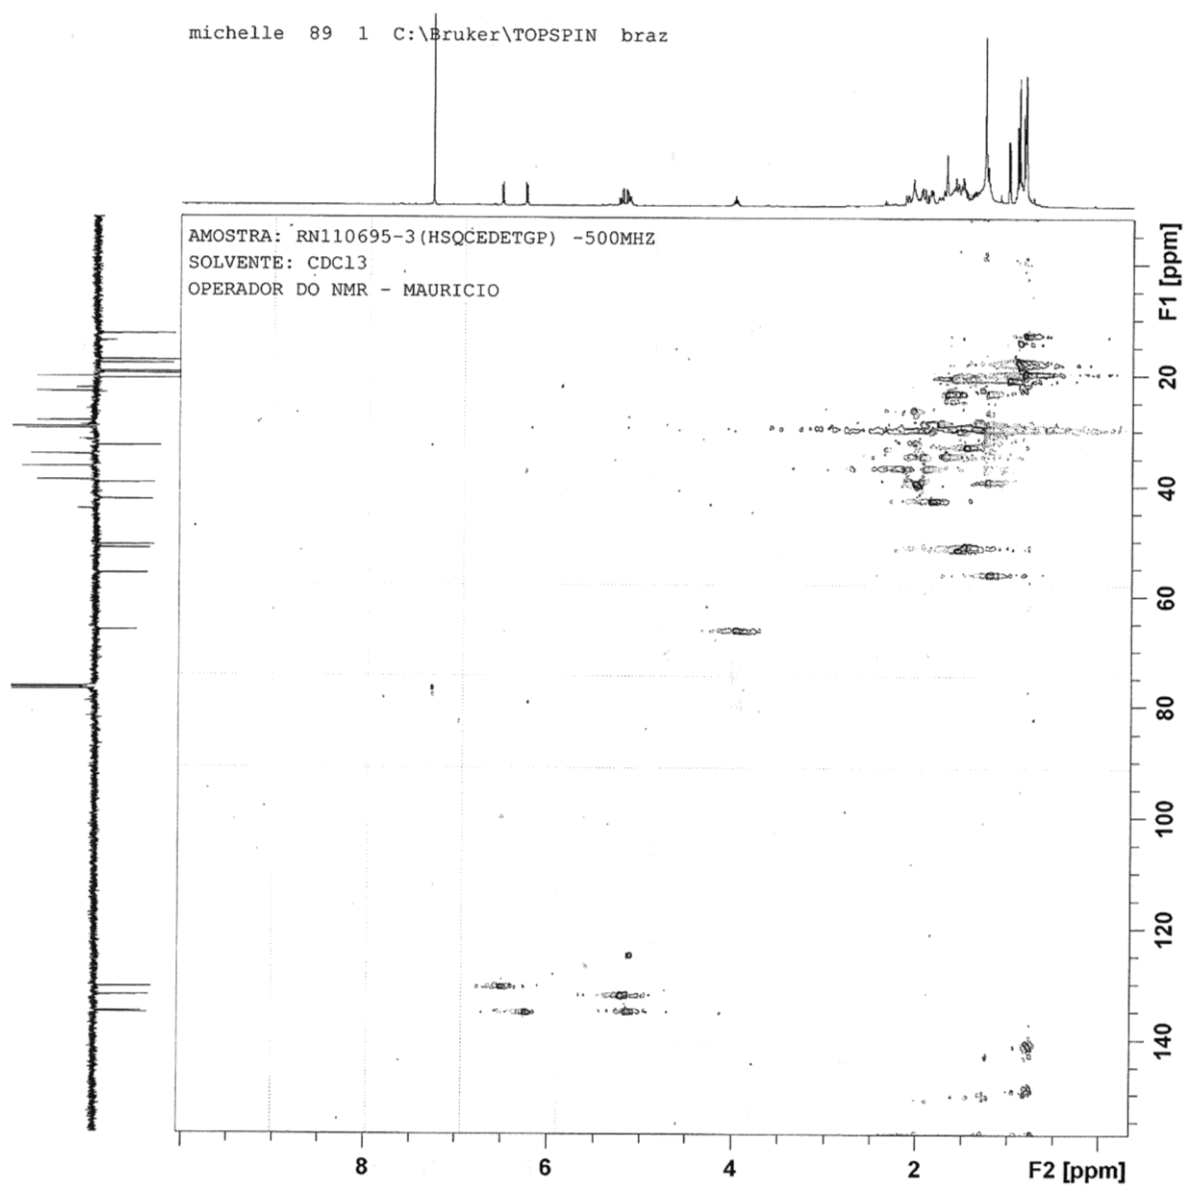



**Figure S10.** HMBC NMR (500 MHz, CDCl<sub>3</sub>) spectrum of compound 6.

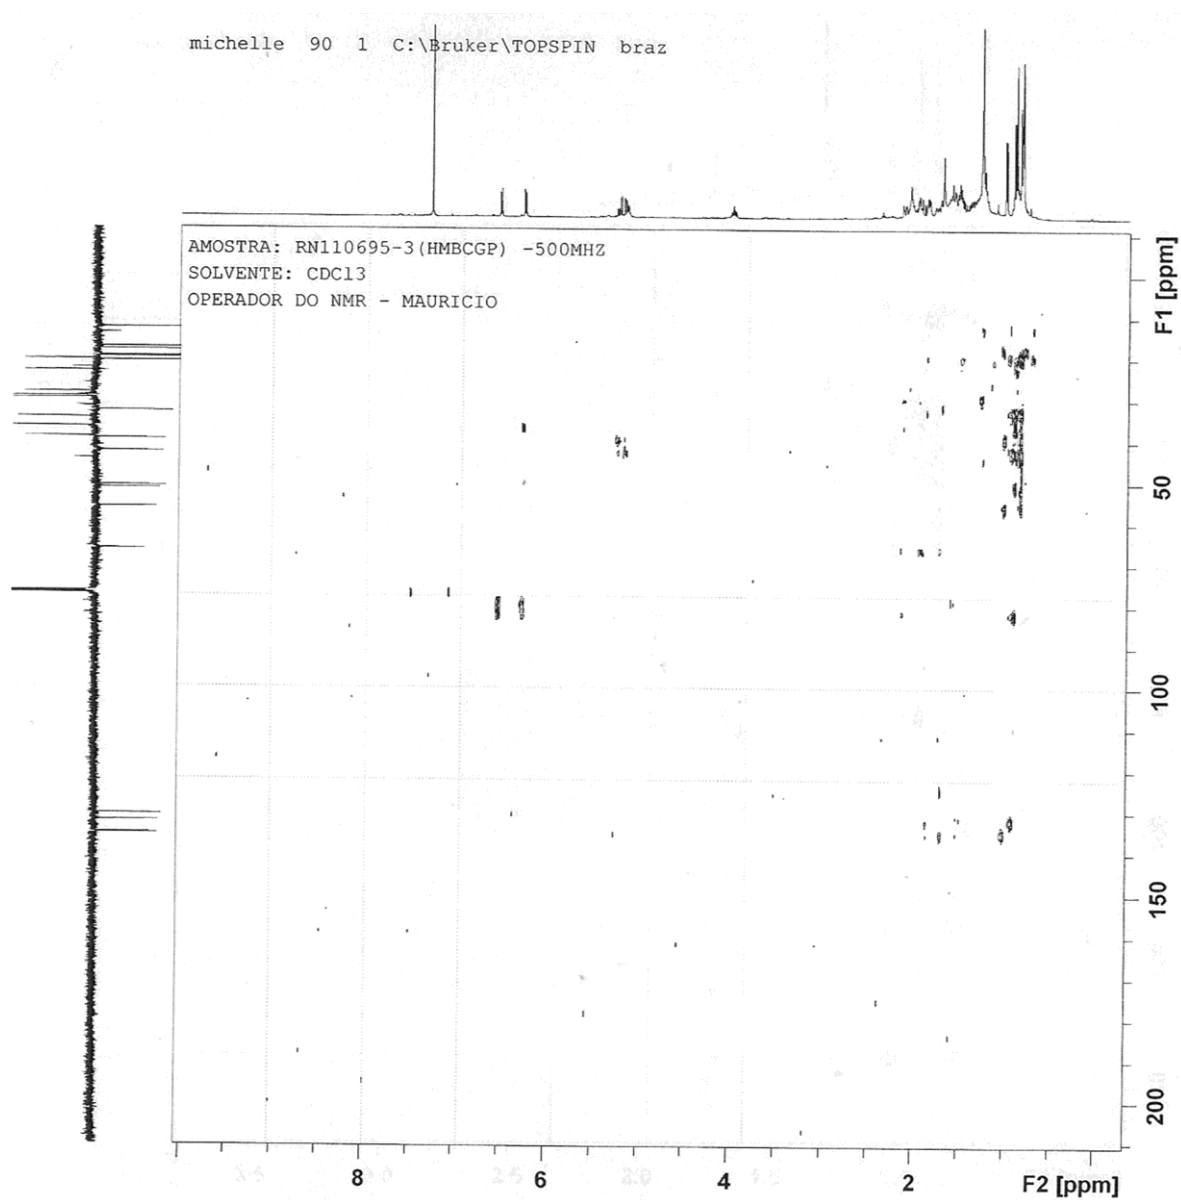

Supplement: s1 [file s1]
